# Supplementary material
Source: MDPI journal article supplement (https://www.mdpi.com/2071-1050/14/19/12594)
Supplement: s1 [file s1]

## Supplementary information

# Status and prospects of green building in the Middle East and North Africa (MENA) region with a focus on the Moroccan context

Redouan Assadiki <sup>1</sup>, Gérard Merlin <sup>2</sup>, Hervé Boileau <sup>2</sup>, Catherine Buhé <sup>2</sup>, Fouzi Belmir <sup>1</sup>

<sup>1</sup> Laboratory of Materials, Processes, Catalysis, and Environment, Higher School of Technology, Sidi Mohamed Ben Abdellah University, Fez, 30000, Morocco

<sup>2</sup> LOCIE, UMR 5271, Polytech Annecy-Chambéry, Université Savoie Mont Blanc-CNRS, Le Bourget-du-Lac, 73376, France

**Table S1.** Profiles of the respondents

|                                                                                                                               | Man       |       | Women     |       | Total     |       |
|-------------------------------------------------------------------------------------------------------------------------------|-----------|-------|-----------|-------|-----------|-------|
|                                                                                                                               | Frequency | %     | Frequency | %     | Frequency | %     |
| By profession                                                                                                                 |           |       |           |       |           |       |
| Architect                                                                                                                     | 18        | 10.18 | 24        | 14.37 | 42        | 24.55 |
| Engineer                                                                                                                      | 45        | 26.95 | 17        | 10.18 | 62        | 37.13 |
| Project Manager                                                                                                               | 6         | 3.59  | 0         | 0.00  | 6         | 3.59  |
| Public service managers                                                                                                       | 7         | 4.19  | 3         | 1.80  | 10        | 5.99  |
| Accredited Professional (HQE, BREEAM-AP...)                                                                                   | 9         | 5.39  | 6         | 3.59  | 15        | 8.98  |
| Academics                                                                                                                     | 20        | 12.57 | 8         | 4.79  | 28        | 17.37 |
| Others                                                                                                                        | 3         | 1.80  | 1         | 0.60  | 4         | 2.40  |
| By region                                                                                                                     |           |       |           |       |           |       |
| Centrale region (Rabat Casablanca)                                                                                            | 68        | 40.72 | 44        | 26.35 | 112       | 67.07 |
| North region                                                                                                                  | 13        | 7.78  | 7         | 4.19  | 20        | 11.98 |
| Fez- Meknes region                                                                                                            | 7         | 4.19  | 5         | 2.99  | 12        | 7.19  |
| South region                                                                                                                  | 20        | 11.98 | 3         | 1.80  | 23        | 13.77 |
| Engineering speciality: Civil engineering (construction, structure); energy, environment; other: urban planner, QHSE Engineer |           |       |           |       |           |       |

The 17% of respondents were younger practitioners in the sector, with less than 3 years of experience, 39% had between 3 and 10 years, 25% had between 10 and 20 years, and 25% had more than 20 years of expertise.

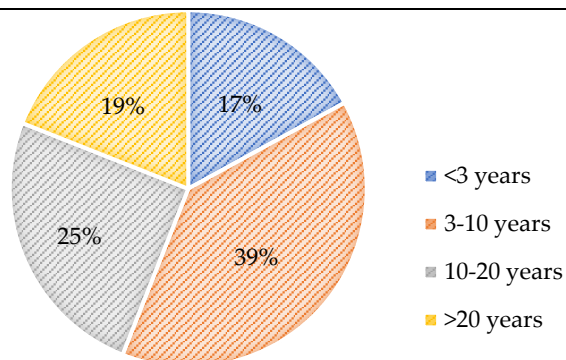

**Figure S1.** Years of experience of participants

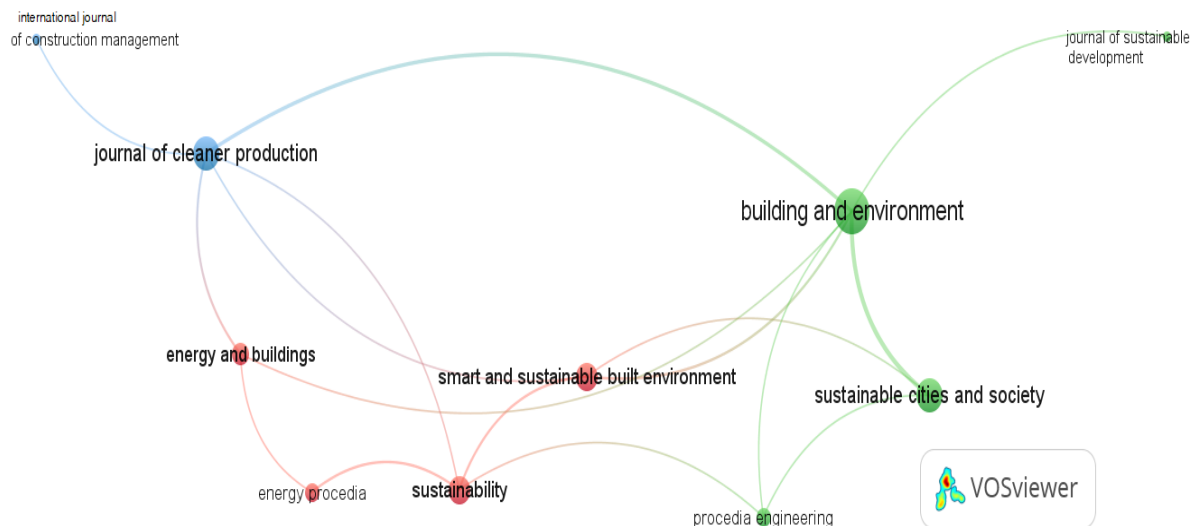

**Figure S2.** Network (Total link strength) of publishing scientific journals in the MENA region (2000-2021).

The network was generated using the "Total link strength" network function, based on the distance and size of the node which reflects the impact in GB research. The connecting lines show the citation links between journals, e.g. the journal *Building and Environment* shows a stronger citation link with the journal *Sustainable Cities and society* than the journal *Sustainability*. Therefore, even clusters and journals that are proximate to each other have stronger citation links that are singly located.

**Table S2.** Comparison of research areas in the MENA region, Africa, and the world.

| Review                                                                                                           | Keyword                  | Occurrences | Total link strength |
|------------------------------------------------------------------------------------------------------------------|--------------------------|-------------|---------------------|
| Current study: MENA (2000-2021)                                                                                  | Sustainability           | 43          | 362                 |
|                                                                                                                  | Rating System            | 33          | 261                 |
|                                                                                                                  | Energy                   | 32          | 273                 |
|                                                                                                                  | Survey                   | 31          | 277                 |
|                                                                                                                  | Green building           | 30          | 252                 |
| A scientometric analysis and visualization of green building research in Africa (2000-2020) [1]                  | Sustainable development  | 82          | 293                 |
|                                                                                                                  | Sustainable construction | 38          | 137                 |
|                                                                                                                  | Intelligent buildings    | 37          | 132                 |
|                                                                                                                  | Green building           | 26          | 87                  |
|                                                                                                                  | Energy efficiency        | 25          | 71                  |
| Scientometric review of global research trends on green buildings in construction journals from 1992 to 2018 [2] | Sustainability           | 149         | 119                 |
|                                                                                                                  | Green building           | 137         | 114                 |
|                                                                                                                  | Sustainable construction | 113         | 68                  |
|                                                                                                                  | LEED                     | 57          | 49                  |
|                                                                                                                  | Energy efficiency        | 46          | 42                  |

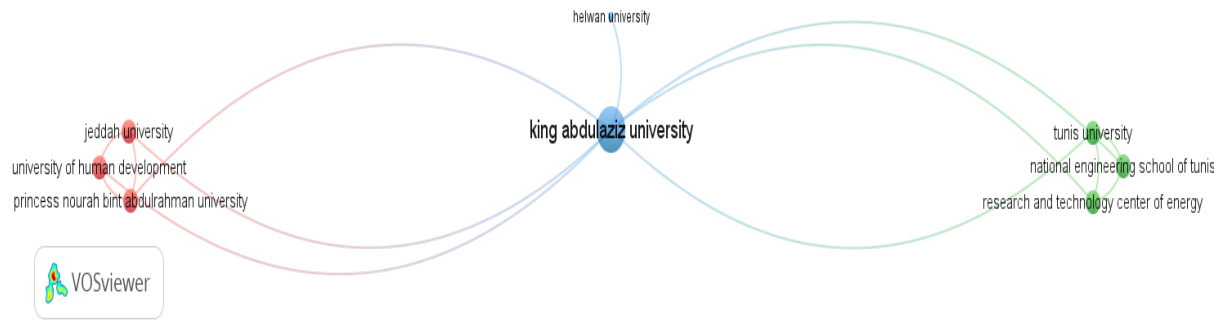

**Figure S3.** Collaborative network of institutions in MENA region.

The three Tunisian academies have collaborated with two Saudi research units King Abdelaziz University and Jeddah University. They have also established research links with national institutes such as Princess Noura Abdul Rahman University and regionally with the Iraqi University of Human Development. Finally, King Abdelaziz University (KSA) cooperates with the different institutes of two clusters (red and green) and with the Egyptian Helwān University.

This is confirmed by the analysis of the country's scientific collaboration networks. This network was constructed in 25 countries, and total link strength values were used to identify the most influential in the network. The larger nodes represent higher values of weighted degree, and the lines indicate the cooperative relationships of each pair of countries.

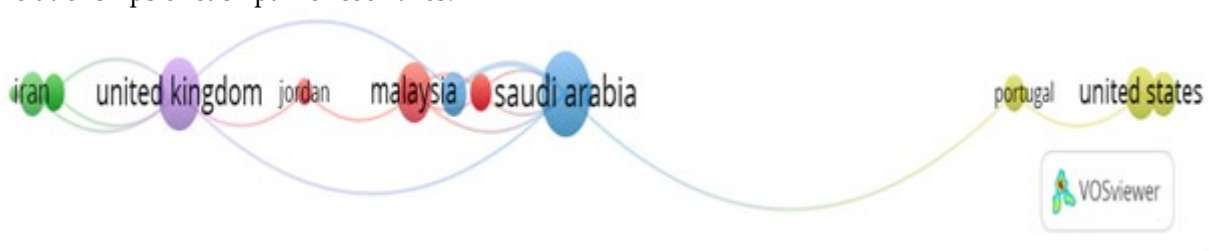

**Figure S4.** Map of country co-authorship network based on "Total link strength".

## References

1. Oguntona, O.A.; Aigbavboa, C.O.; Thwala, W.D. A Scientometric Analysis and Visualization of Green Building Research in Africa. *J. Green Build.* **2021**, *16*, 83–86, doi:10.3992/jgb.16.2.83.
2. Wuni, I.Y.; Shen, G.Q.P.; Osei-Kyei, R. Scientometric Review of Global Research Trends on Green Buildings in Construction Journals from 1992 to 2018. *Energy Build.* **2019**, *190*, 69–85, doi:10.1016/j.enbuild.2019.02.010.
